# Supplementary material for: Fenton-like reaction triggered chemical redox-cycling signal amplification for ultrasensitive fluorometric detection of H2O2 and glucose
Source: Royal Society of Chemistry journal article supplement (doi:10.1039/d3an01682j), 2023-12-04
Supplement: d3an01682j1.pdf [file d3an01682j1.pdf]

**Electronic Supplementary Information**  
**for**  
**Fenton-like reaction triggered chemical redox-cycling signal**  
**amplification for ultrasensitive fluorometric detection of**  
**H<sub>2</sub>O<sub>2</sub> and glucose**

Lu Sun, Lin-Ge Chen, Hai-Bo Wang\*

*College of Chemistry and Chemical Engineering, Xinyang Key Laboratory of Functional Nanomaterials for Bioanalysis, Institute for Conservation and Utilization of Agro-bioresources in Dabie Mountains, Xinyang Normal University, Xinyang 464000, P. R. China*

E-mail address: wanghaibohn@163.com (H.-B. Wang).

## Supporting Figures

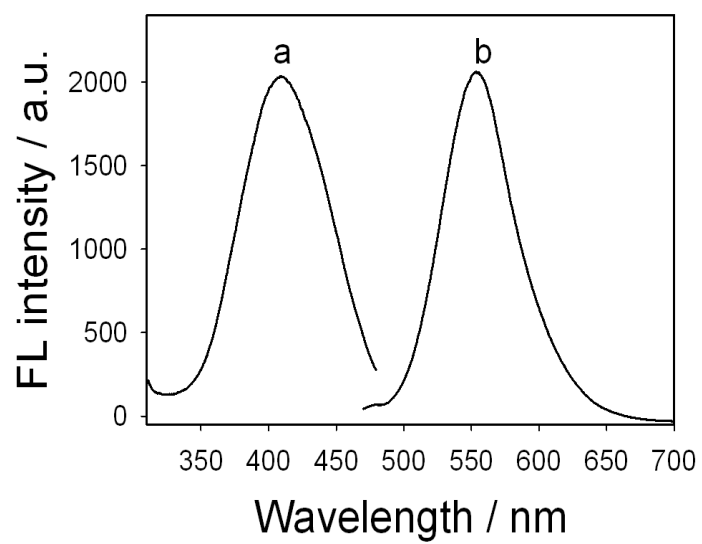

**Fig. S1** Fluorescence excitation spectra (a) and fluorescence emission spectra (b) of pure DAP

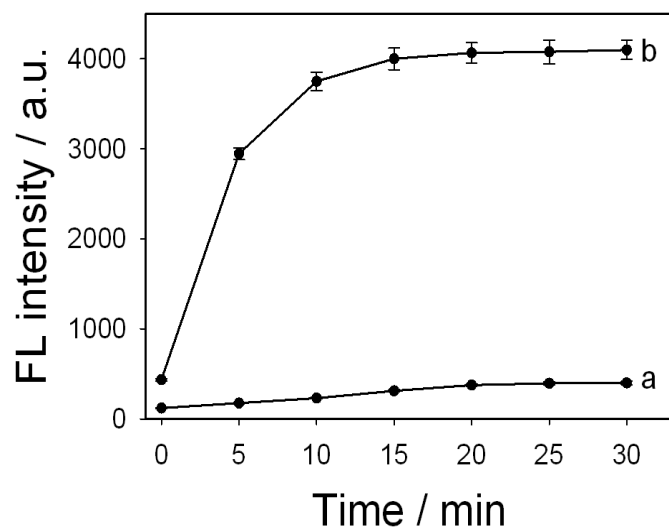

**Fig. S2** Relationship between reaction time and fluorescence intensity at 555 nm in the presence of  $\text{Cu}^{2+} + \text{OPD}$  (a) and  $\text{Cu}^{2+} + \text{H}_2\text{O}_2 + \text{OPD}$  (b).

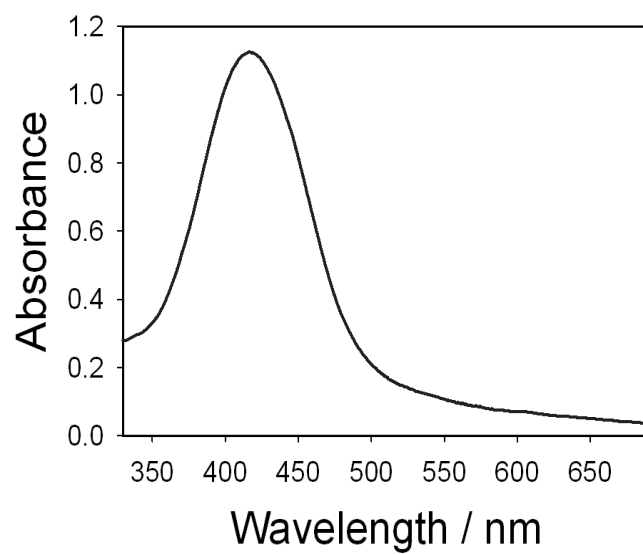

**Fig. S3** UV-Vis absorption spectra of pure DAP.

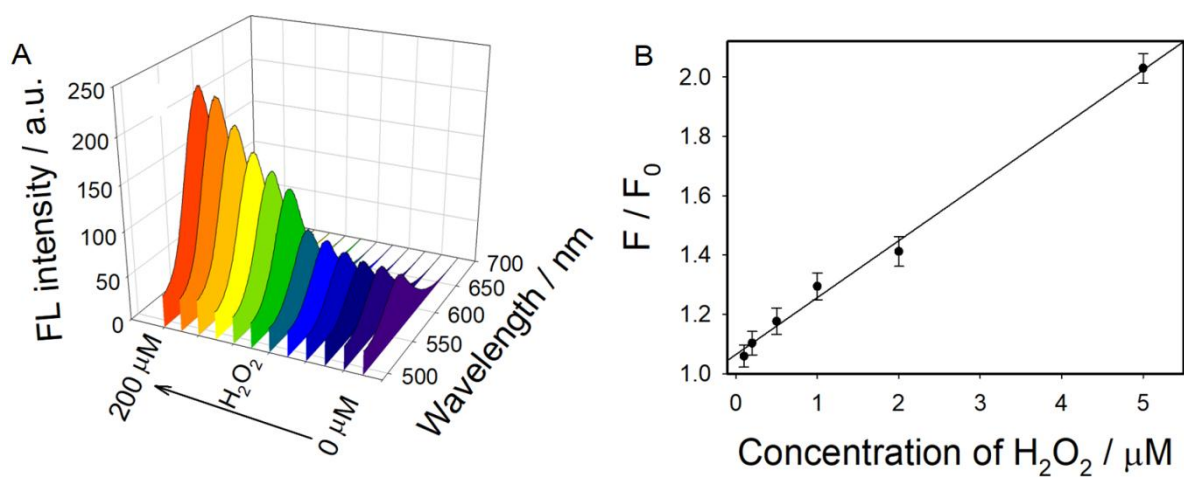

**Fig. S4** (A) Fluorescence spectra of 200  $\mu\text{M}$  OPD in the presence of increasing  $\text{H}_2\text{O}_2$  concentrations from bottom to top, the concentrations of  $\text{H}_2\text{O}_2$  are 0, 0.1, 0.2, 0.5, 1, 2, 5, 10, 20, 50, 100, 200  $\mu\text{M}$ , respectively. (B) The calibration curve between the  $F/F_0$  and the  $\text{H}_2\text{O}_2$  concentrations. The error bars are the standard deviation of three repetitive measurements.
